# Supplementary material
Source: publisher site journal article supplement (http://kjim.org/upload/media/kjim-2023-206-Supplementary-3.pdf)
Supplement: Supplementary file 1 [file kjim-2023-206-Supplementary-3.pdf]

### 3. Patient preferences

**Table1. Characteristics of the subjects**

|                                     | Total<br>(N=809) | Patients taking ULT<br>(n=755)  |                                | P                |
|-------------------------------------|------------------|---------------------------------|--------------------------------|------------------|
|                                     |                  | ULT<br>adherence≥80%<br>(n=673) | ULT<br>adherence<80%<br>(n=82) |                  |
| Age, mean±SD, years                 | 53.5 ± 13.7      | 54.2 ± 13.5                     | 49.1 ± 13.4                    | <b>0.001</b>     |
| Male                                | 789 (97.6)       | 656 (97.6)                      | 81 (98.8)                      | 1.000            |
| BMI, mean±SD, kg/m <sup>2</sup>     | 26.4 ± 3.7       | 26.3 ± 3.8                      | 26.6 ± 3.1                     | 0.333            |
| Disease duration,<br>mean±SD, years | 8.2 ± 7.9        | 8.4 ± 7.9                       | 6.1 ± 6.4                      | <b>0.011</b>     |
| Comorbidities                       | 548 (67.7)       | 466 (69.2)                      | 49 (59.8)                      | 0.082            |
| Urinary stone                       | 57 (7.0)         | 48 (7.1)                        | 7 (8.5)                        | 0.644            |
| Diabetes mellitus                   | 97 (12.0)        | 86 (12.8)                       | 7 (8.5)                        | 0.270            |
| Hypertension                        | 352 (43.5)       | 305 (45.3)                      | 27 (32.9)                      | <b>0.033</b>     |
| Dyslipidemia                        | 220 (27.2)       | 192 (28.5)                      | 16 (19.5)                      | 0.084            |
| Cardiovascular disease*             | 96 (11.9)        | 85 (12.6)                       | 6 (7.3)                        | 0.163            |
| Cerebrovascular disease             | 21 (2.6)         | 17 (2.5)                        | 1 (1.2)                        | 0.710            |
| Renal dysfunction                   | 87 (10.8)        | 75 (11.1)                       | 7 (8.5)                        | 0.474            |
| Gout attacks in the past year       |                  |                                 |                                |                  |
| None                                | 342 (42.3)       | 311 (46.2)                      | 20 (24.4)                      | <b>&lt;0.001</b> |
| 1-3                                 | 359 (44.4)       | 271 (40.3)                      | 51 (62.2)                      |                  |
| ≥4                                  | 108 (13.3)       | 91 (13.5)                       | 11 (13.4)                      |                  |
| Current use of ULT                  | 755 (94.5)       | -                               | -                              | -                |
| Allopurinol                         | 138 (18.3)       | 126 (18.7)                      | 12 (14.6)                      | 0.366            |
| Febuxostat                          | 313 (41.5)       | 283 (42.1)                      | 30 (36.6)                      | 0.343            |
| Benzbromarone                       | 15 (2.0)         | 15 (2.2)                        | 0 (0)                          | 0.392            |

|                               |            |            |           |       |
|-------------------------------|------------|------------|-----------|-------|
| Do not know                   | 258 (34.2) | 223 (33.1) | 35 (42.7) | 0.108 |
| Use of alternative treatments | 131 (16.4) | 112 (16.8) | 13 (16.5) | 0.940 |
| Natural supplements           | 117 (14.7) | 101 (15.2) | 12 (15.4) | 0.968 |
| Herbal remedies               | 15 (1.9)   | 13 (2.0)   | 0 (0)     | 0.381 |

Data are presented as number (%). ULT, urate lowering therapy; SD, standard deviation; BMD, body mass index

\*includes ischemic heart disease, myocardial infarction, arrhythmia, congestive heart failure

**Table 2. Patients' perspectives and preferences for gout management**

|                                                      | Total<br>(N=809) | Patients taking ULT<br>(n=755)  |                                | P            |
|------------------------------------------------------|------------------|---------------------------------|--------------------------------|--------------|
|                                                      |                  | ULT<br>adherence≥80%<br>(n=673) | ULT<br>adherence<80%<br>(n=82) |              |
| <b>Know management strategies</b>                    |                  |                                 |                                |              |
| Know well                                            | 299 (37.0)       | 258 (38.3)                      | 23 (28.0)                      | 0.063        |
| Know a little                                        | 467 (57.8)       | 387 (57.5)                      | 52 (63.4)                      |              |
| Do not know                                          | 42 (5.2)         | 28 (4.2)                        | 7 (8.5)                        |              |
| <b>Perceive gout as a lifelong disease</b>           |                  |                                 |                                |              |
| Strongly agree                                       | 344 (42.5)       | 297 (44.1)                      | 28 (34.1)                      | 0.322        |
| Agree                                                | 394 (48.7)       | 315 (46.8)                      | 45 (54.9)                      |              |
| Disagree                                             | 16 (2.0)         | 15 (2.2)                        | 1 (1.2)                        |              |
| Strongly disagree                                    | 27 (3.3)         | 24 (3.6)                        | 3 (3.7)                        |              |
| Do not know                                          | 28 (3.5)         | 22 (3.3)                        | 5 (6.1)                        |              |
| <b>Efforts toward making lifestyle modifications</b> |                  |                                 |                                |              |
| Any*                                                 | 722 (89.2)       | 606 (90.0)                      | 69 (84.1)                      | 0.101        |
| Regular exercise                                     | 449 (55.6)       | 380 (56.5)                      | 40 (48.8)                      | 0.181        |
| Dietary modification                                 | 417 (51.6)       | 362 (53.8)                      | 34 (41.5)                      | <b>0.035</b> |
| Alcohol restriction                                  | 614 (75.9)       | 522 (78.4)                      | 25 (30.5)                      | 0.104        |

|                                                      |            |            |           |              |
|------------------------------------------------------|------------|------------|-----------|--------------|
| Education preferences about gout management          |            |            |           |              |
| During clinic visit                                  | 582 (71.9) | 492 (73.1) | 57 (69.5) | 0.490        |
| Health education program                             | 15 (1.9)   | 13 (1.9)   | 0 (0)     | 0.381        |
| TV and radio programs                                | 83 (10.3)  | 70 (10.4)  | 6 (7.3)   | 0.381        |
| Written information<br>(books, magazines, pamphlets) | 33 (4.5)   | 30 (4.3)   | 1 (1.2)   | 0.239        |
| Internet searching                                   | 283 (35.0) | 229 (34.0) | 36 (43.9) | 0.077        |
| Friends/family members<br>with gout                  | 58 (7.2)   | 50 (7.4)   | 5 (6.1)   | 0.661        |
| Never sought                                         | 28 (3.5)   | 21 (3.1)   | 1 (1.2)   | 0.498        |
| Treatment preferences                                |            |            |           |              |
| ULT only                                             | 230 (28.4) | 204 (30.3) | 13 (15.9) | <b>0.006</b> |
| Lifestyle modification only                          | 141 (17.4) | 104 (15.5) | 23 (28.0) | <b>0.004</b> |
| ULT and lifestyle modification                       | 434 (53.6) | 362 (53.8) | 45 (54.9) | 0.852        |
| Others <sup>†</sup>                                  | 8 (1.0)    | 6 (0.9)    | 2 (2.4)   | 0.212        |

Data are presented as number (%). ULT, urate lowering therapy.

\* Practicing at least one of regular exercise, dietary modification, and alcohol restriction.

<sup>†</sup> Others include natural supplements, herbal remedies, stress management, and joint injection.

**Table 3. Factors affecting adherence to urate lowering therapy**

|                                          | Univariable |             |              | Multivariable |             |              |
|------------------------------------------|-------------|-------------|--------------|---------------|-------------|--------------|
|                                          | OR          | 95% CI      | P            | OR            | 95% CI      | P            |
| Age                                      | 1.01        | 1.001-1.047 | <b>0.002</b> | 1.03          | 1.011-1.048 | <b>0.002</b> |
| Disease duration                         | 1.05        | 1.010-1.089 | <b>0.013</b> | -             | -           | -            |
| Having hypertension                      | 1.52        | 0.947-2.428 | 0.083        | -             | -           | -            |
| Acknowledgement of management strategies | 2.80        | 1.105-7.119 | <b>0.030</b> | 3.56          | 1.335-9.510 | <b>0.011</b> |
| Practicing dietary modification          | 1.64        | 1.032-2.615 | <b>0.036</b> | 1.50          | 0.928-2.414 | 0.098        |
| Preference for taking ULT for treatment  | 2.17        | 1.289-3.635 | <b>0.003</b> | 2.07          | 1.214-3.516 | <b>0.007</b> |

OR, odd ratio; CI, confidence interval; ULT, urate lowering therapy
